# Supplementary material for: Biocapital e mercado de futuros biotecnológicos
Source: Frontiers journal article supplement (doi:10.3389/fmicb.2022.1088477), 2009-01-01
Supplement: Table_1.pdf [file Table_1.pdf]

### Supplementary tables and Figures:

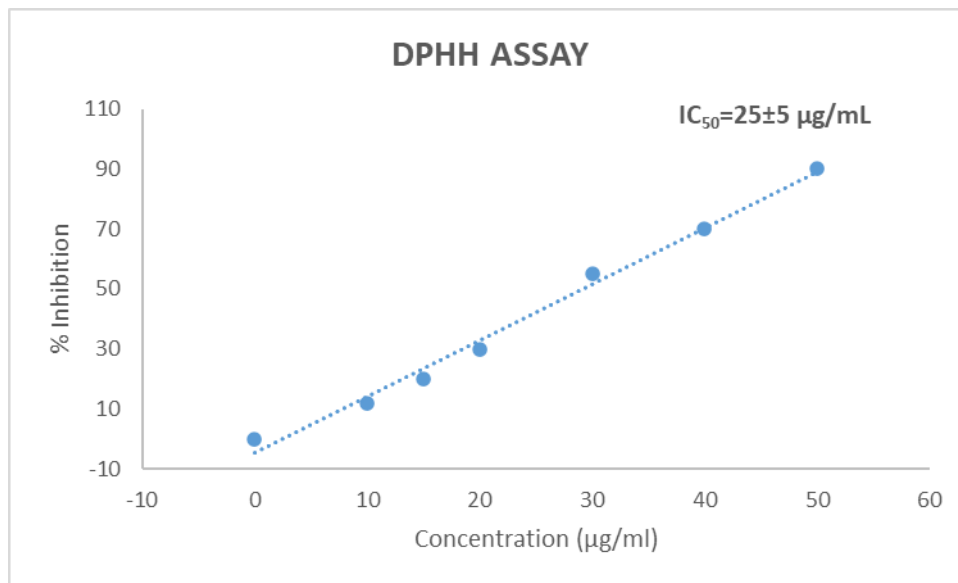

**Supplementary Figure 1.** Scatter plot analysis of DPPH assay showing the  $IC_{50}$  value of carotenoid extract.

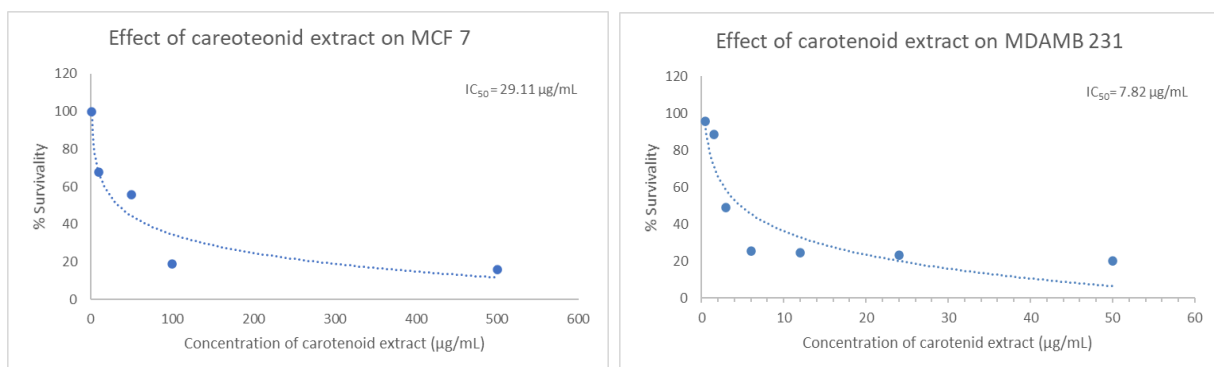

**Supplementary Figure 2.** Representative result of MTT assay showing significant dose-dependent inhibition of proliferation by carotenoid extract in breast cancer cell line MCF7 and MDA-MB-231. Experiments were repeated twice,  $IC_{50}$  values were calculated, and after statistical analysis, were found to be  $29.35\pm0.82 \mu\text{g/ml}$  ( $IC_{50}$  for MCF7) and  $7.85\pm0.21 \mu\text{g/ml}$  ( $IC_{50}$  for MDA-MB-231).

**Supplementary Table 1.**

| <b>Strain</b>                                    | <b>Inhibition zone diameter (mm)</b> | <b>% Inhibition</b> |
|--------------------------------------------------|--------------------------------------|---------------------|
| <i>Staphylococcus aureus</i> (MTCC 1430)         | 12.5±0.2                             | 69.4                |
| <i>Bacillus firmus</i> (MTCC 488)                | 14.3±0.2                             | 79.4                |
| <i>Bacillus subtilis</i> (MTCC 121)              | 13.3±0.3                             | 74.07               |
| <b><i>Escherichia coli</i> (MTCC 1610)</b>       | 17.6±0.3                             | 90.5                |
| <i>B. licheniformis</i> (MTCC 429)               | 13.4±0.2                             | 83.75               |
| <i>Listeria monocytogenes</i> (MTCC 839)         | 10.2±0.3                             | 59.8                |
| <i>B. thuringiensis</i> (MTCC 1953)              | 12.5±0.5                             | 69.4                |
| <i>Micrococcus luteus</i> (MTCC 106)             | 10±0.3                               | 55.4                |
| <b><i>Pseudomonas aeruginosa</i> (MTCC 1934)</b> | 15.6±0.4                             | 82.1                |
| <i>Candida albicans</i> (MTCC 183)               | 7±0.1                                | 41.5                |
| <i>Saccharomyces cerevisiae</i> (MTCC 170)       | 7.1±0.2                              | 41.9                |
| <i>Fusarium oxysporum</i> (MTCC 2773)            | --                                   | --                  |
| <i>Asperigillus niger</i> (MTCC 281)             | --                                   | --                  |

**Supplementary Table 1.** Showing antimicrobial property of the extracted lipidic carotenoids. One way ANOVA results showed that the difference between the means were significant as  $p \leq 0.05$ .
